## Self-testing knowledge and beliefs on HIV self-testing use in central Uganda.

1 Self-testing knowledge and beliefs on HIV self-testing use in central Uganda.

2

3

4

5

6

7

8 Gerald Mukisa Nsereko<sup>1</sup>, Loyce Kiiza Kobusingye<sup>1</sup>, Khamisi Musanje<sup>1</sup>, Joanita Nangendo<sup>2</sup>,  
9 Simon Nantamu<sup>1</sup>, and Martin Mabunda Baluku<sup>1</sup>

10

11

12

13

14 <sup>1</sup>Department of Educational, Social and Organizational Psychology, Makerere University,  
15 Kampala, Uganda

16 <sup>2</sup> Clinical Epidemiology Unit, College of Health Sciences, Makerere University, Kampala,  
17 Uganda

18 \*Correspondence: [jeromegerald.jg@gmail.com](mailto:jeromegerald.jg@gmail.com)

19

20

21

22

23

24

25

26

27

28

29

30 **NOTE: This preprint reports new research that has not been certified by peer review and should not be used to guide clinical practice.**

## Self-testing knowledge and beliefs on HIV self-testing use in central Uganda.

### 31 **Abstract**

32 The government of Uganda and its implementing partners have made significant  
33 investments in HIV self-testing (HST) services to reduce clinic-related barriers to HIV testing.  
34 However, although HSTs have been around for a reasonable time, their uptake, especially  
35 among unskilled working individuals, has remained suboptimal, which threatens the efforts to  
36 achieve the 95-95-95 UNAIDS goals to end HIV by 2030.

37 This study set out to examine whether knowledge and individual beliefs about self-  
38 testing influence the use of HIV self-tests among casual workers in Kampala. This cross-  
39 sectional study was conducted among 453 participants selected via systematic random  
40 sampling from Darling Uganda Ltd. in Wakiso district between July and August 2023.  
41 Standardized questionnaires were used, and the analysis was performed using Pearson  
42 Correlations and Linear Regression in SPSS.

43 The findings indicate that HIV self-testing (HST) knowledge was positively related to  
44 HST use ( $r=.387$ ,  $p\leq.01$ ), perceived susceptibility ( $r=.212$ ,  $p\leq.01$ ), perceived benefits ( $r=.152$ ,  
45  $p\leq.01$ ), and perceived barriers ( $r=.101$ ,  $p\leq.05$ ). Individual beliefs, that is, perceived  
46 susceptibility ( $r=.355$ ,  $p\leq.01$ ), perceived benefits ( $r=.487$ ,  $p\leq.01$ ), and perceived barriers  
47 ( $r=.148$ ,  $p\leq.01$ ), were significantly related to HST use. Perceived benefits were the best  
48 predictor of HST use among this population ( $\beta=.442$ ,  $p=.000$ ). Therefore, (44.2%) of HST use  
49 was attributed to the benefits attached to the service.

50 Therefore, increasing awareness regarding the benefits of HST among such  
51 populations increases the chances of HIV testing, particularly among men. This can pave the  
52 way for the 95-95-95 goal by 2030 of UNAIDS.

53

### 54 **Introduction**

55 HIV remains a major global public health challenge. By 2022 [1], approximately 40  
56 million people were estimated to be living with HIV, of which 25.7 million people live in sub-  
57 Saharan Africa [1]. In Uganda alone, about 1.5 million people are estimated to live with HIV  
58 [1]. In 2022, of the 1.5 million HIV infections in Uganda, 5.8% occurred among people aged  
59 15-49 years and above who form the largest percentage of the national workforce [2]. This  
60 creates a need to intensify interventions to reduce HIV infection in this sub-population. To  
61 reduce the burden of HIV and possibly end it by 2030, the UNAIDS proposed ambitious 95-  
62 95-95 targets in 2020[1]. Uganda has made strides toward the 95-95-95 HIV UNAIDS target  
63 [2, 3].

64 Provider stigma, that is, fear of being seen testing at the clinic, distance to health centres  
65 (in some rural areas), financial constraints, and access to testing sites, have been identified as  
66 the main barriers to HIV testing [5]. Incidentally, most of these are common to clinic-based  
67 testing, hence a need to promote other HIV testing methods [6]. HST services are increasingly  
68 gaining traction as important alternatives to counteract barriers surrounding clinic-based testing  
69 [7]. They are considered private and convenient ways to help people who do not know their  
70 status [7]. By employing either oral swab or finger-prick self-test kits, the person can carry  
71 out this action wherever it's most convenient for them; at home, at work, or elsewhere [8, 9,  
72 10].

## Self-testing knowledge and beliefs on HIV self-testing use in central Uganda.

73           The increase in infections among adults has been attributed to limited testing, for  
74 example, in 2018, approximately 60% of adults in Uganda were reluctant to test for HIV given  
75 the stigma surrounding a positive HIV test result [2, 11]. Knowledge of one's HIV status is  
76 considered the first step in the HIV care cascade and an entry point for reducing HIV infections  
77 [12, 13]. In this regard, the Uganda Government has launched several community-based  
78 campaigns to create awareness and encourage voluntary testing among the population [2].  
79 While community-targeted strategies are important in promoting public health initiatives,  
80 certain contexts, like workplaces, seem to miss out on such initiatives, yet adults spend more  
81 time at the workplace than in communities [14]. Due to the hectic schedules, tight deadlines,  
82 and occasionally inconvenient and time-consuming commutes to pharmacies or medical  
83 facilities from work, this population finds it hard to do testing for HIV [4].

84 HIV self-testing Kits are available for free in public health centers and at low cost in pharmacies  
85 to increase accessibility. However, test accessibility does not guarantee successful coverage  
86 and use [15]. Perceived susceptibility, (individual knowledge about the tests and  
87 attitudes/beliefs), perceived benefits and perceived barriers towards actual usage, maybe be  
88 better understood through obtaining insights into the targeted potential users [16]. The Health  
89 Belief Model (HBM) proposes that for individuals to change their behavior towards a health  
90 intervention, they are influenced by both modifying factors and individual beliefs [17]. This  
91 study aimed to test whether HST knowledge and individual beliefs predict use of HST services  
92 among workers through the health beliefs model lens.

93

## 94 **Methods**

### 95 **Study design and setting**

96           We conducted a cross-sectional survey between June and September 2023 to gather  
97 information from many respondents in a short period of time and in the most effective way  
98 [18]. The study is part of a bigger study titled “Effect of a workplace based HIVST intervention  
99 on HIVST use among unskilled workers in Wakiso”. It was undertaken in Darling Uganda Ltd,  
100 a manufacturing company located on Jinja Road, Namanve Industrial area. The organization is  
101 a component of the Darling Group, which conducts business in 18 nations in Eastern, Western,  
102 Southern, and Central regions of Africa, producing premium hair extensions produced from  
103 premium Japanese fiber for both the domestic and foreign markets. The company has a little  
104 over 3,000 unskilled workers who support the entire production process coming from several  
105 units like packing, sorting, lifting, sealing among others. These require a sizable number of  
106 human resource due to the high demand of hair extensions in the Ugandan market and beyond.  
107 Majority of the employees have attained lower high school education with basic life skills that  
108 help them perform tasks given to them in Darling Uganda.

### 109 **Study population**

110           Participants were enrolled into the study during the month of June 2023 if they met the  
111 following eligibility criteria; aged 18 years and above and willing to offer a written informed  
112 consent to join the study. Participants were excluded if they showed disinterest in participating.

### 113 **Ethics**

## Self-testing knowledge and beliefs on HIV self-testing use in central Uganda.

114 The study was approved by the Makerere University School of Medicine Research  
115 Ethics Committee; Mak-SOMREC-2022-515 and received administrative clearance from the  
116 participating study site (Darling Uganda Limited). All prospective participants gave written  
117 consent prior to joining the study.

### 118 **Sampling and sample size**

119 The modified Kish Leslie formula ( $N = (Z2\alpha/2P(1-P))/ d2/*DE$ ) (21) was used to  
120 determine the required sample size. A 95% confidence interval equivalent to 1.96 ( $Z2\alpha$ ),  
121 assuming a design effect (DE) = 2, 5% tolerable random error (d), 15% probability of not using  
122 the HST and (P) 85% sample proportion that uses HST [19] informed the study. An estimated  
123 minimum sample size of 425 unskilled workers both male and female was arrived at. However,  
124 453 was the total of participants who agreed to engage in the study.

125 Systematic random sampling was used. Here the participants were listed and numbered  
126 according to the sampling frame, the population (3000) was divided by the required sample  
127 size of 453. An interval fraction of (7) was used to select elements for inclusion into the study  
128 depending on the inclusion and exclusion criteria.

### 129 **Data collection**

130 The study adapted self-administered closed-ended questionnaires; data was gathered on a 5-  
131 point Likert scale ranging from 1 (strongly disagree) to 5 (strongly agree). HST knowledge was  
132 measured using HIV self-testing knowledge questionnaire HSTKQ (Gumede & Sibiya, 2018).  
133 The HSTKQ is a 15-item tool with a reliability of ( $\alpha = .811$ ). Individual beliefs were measured  
134 with the HIV Testing Belief Scale (HTBS) developed by Alemayehu (2015). The HTBS is a  
135 39-item tool designed to measure the HBM constructs. The current study used 3 items for  
136 perceived susceptibility with a reliability of ( $\alpha = .485$ ), 6 items for barriers ( $\alpha = .718$ ), and 6  
137 items for benefits ( $\alpha = .631$ ) as they relate to workers' use of HST. Self-testing use was  
138 measured using a nine-item tool for HIV self-testing (used in Senegal) to measure use and  
139 acceptability (Lyons et al., 2019) with a reliability index of ( $\alpha = .861$ ). The tools were translated  
140 into Luganda (a local dialect) to help in easy comprehension.

### 141 **Data analysis**

142 Data was analysed using descriptives, Pearson Product Moment Correlation Coefficient  
143 (PPMCC), and regression. Descriptives of the different categories of background  
144 characteristics were presented to show the percent distribution of respondents. Correlational  
145 and Linear regression was used to examine HST knowledge, individual beliefs and HST use  
146 among unskilled workers in Wakiso.

## 147 **Results**

148 Cisgender female respondents were 53% more than the cisgender males at 47%. About  
149 29.2% of the respondents were aged 22-25. Majority of the participants were married 33.8%.  
150 Concerning religion, majority were born again Christians at 32.9%. From the study results,  
151 40.6% of the respondents had a high school level of education. Regarding sexual activity,  
152 64.9% reported to having been sexually active in the past 6 months. Table 1 summarizes the  
153 demographic information of the study participants.

Self-testing knowledge and beliefs on HIV self-testing use in central Uganda.

154 Table 1: Descriptives

| Variable    | Levels             | Frequency | Percentage |
|-------------|--------------------|-----------|------------|
| Sex         | Male               | 213       | 47.0       |
|             | Female             | 240       | 53.0       |
|             | Total              | 453       | 100.0      |
| Age         | 18-21              | 105       | 23.4       |
|             | 22-25              | 131       | 29.2       |
|             | 26-29              | 76        | 17.0       |
|             | 30-33              | 58        | 12.9       |
|             | 34-37              | 26        | 5.8        |
|             | 38-41              | 42        | 9.4        |
|             | Above 41           | 10        | 2.2        |
|             | Total              | 453       | 100.0      |
|             | Level of education | Primary   | 80         |
| Highschool  |                    | 180       | 40.6       |
| Certificate |                    | 99        | 22.3       |
| Diploma     |                    | 40        | 9.0        |
| Other       |                    | 44        | 9.9        |
| Total       |                    | 453       | 100.0      |

155

156 HST knowledge is positively related to perceived susceptibility ( $r=.212$ ,  $p\leq.01$ ),  
 157 perceived benefits ( $r=.152$ ,  $p\leq.01$ ), perceived barriers ( $r=.101$ ,  $p\leq.05$ ), and HST use ( $r=.387$ ,  
 158  $p\leq.01$ ). Individual beliefs of perceived susceptibility ( $r=.355$ ,  $p\leq.01$ ); perceived benefits  
 159 ( $r=.487$ ,  $p\leq.01$ ); and perceived barriers ( $r=.148$ ,  $p\leq.01$ ) are significantly related to HST use.

160 Table 2: correlation results

| P                           | 1      | 2      | 3      | 4      | 5 |
|-----------------------------|--------|--------|--------|--------|---|
| 1. HST Knowledge            | 1      |        |        |        |   |
| 2. Perceived Susceptibility | .212** | 1      |        |        |   |
| 3. Perceived Benefits       | .152** | .374** | 1      |        |   |
| 4. Perceived Barriers       | .101*  | .111*  | .101*  | 1      |   |
| 5. HST Use                  | .387** | .355** | .487** | .148** | 1 |

161 \* $p < .05$ , \*\* $p < .01$ , N = 453

162 The regression results in Table 3 indicate that perceived benefits are the biggest  
 163 predictor of HST use among unskilled workers ( $\beta=.442$ ,  $p=.000$ ) that is, 44.2% of HST use is  
 164 attributed to perceived benefits. This is followed by HST knowledge ( $\beta=.285$ ,  $p=.000$ ),  
 165 susceptibility ( $\beta=.140$ ,  $p=.001$ ), and finally barriers ( $\beta=.048$ ,  $p=.097$ ). HST knowledge,  
 166 susceptibility, benefits, and barriers predict HST use by 35.4% [Ad  $R^2=.354$ ,  $F(62.9)$ ,  
 167  $p<.001$ ].

168 Table 3: Regression

Self-testing knowledge and beliefs on HIV self-testing use in central Uganda.

| Model          | Unstandardized Coefficients |            | Standardized Coefficients | t    | Sig.  | Anova     |      |                    |
|----------------|-----------------------------|------------|---------------------------|------|-------|-----------|------|--------------------|
|                | $\beta$                     | Std. Error | Beta                      |      |       | Ad Square | R F  | Sig.               |
| 1 (Constant)   | .605                        | .243       |                           | 2.48 | .013  |           |      |                    |
| HST knowledge  | .285                        | .038       | .293                      | 7.52 | <.000 |           |      |                    |
| Susceptibility | .140                        | .041       | .143                      | 3.46 | <.001 | <.354     | 62.9 | <.001 <sup>b</sup> |
| Benefits       | .442                        | .047       | .382                      | 9.33 | <.000 |           |      |                    |
| Barriers       | .048                        | .029       | .064                      | 1.66 | .097  |           |      |                    |

169 a. Dependent Variable: HST use.

170

171 **Discussion**

172 The study intended to examine the influence of HST knowledge and individual  
 173 beliefs on HST use in central Uganda. The findings indicate that HIV self-testing (HST)  
 174 knowledge was positively related to HST use, perceived susceptibility, perceived benefits, and  
 175 perceived barriers. Individual beliefs, that is, perceived susceptibility, perceived benefits, and  
 176 perceived barriers, were significantly related to HST use. Perceived benefits were the best  
 177 predictor of HST use among this population.

178

179 It was hypothesized that HST knowledge significantly relates and predicts HST use.  
 180 The findings indicate that there exists a positive significant relationship between HST  
 181 knowledge and HST use nevertheless, it predicts up to 28.5% of HST use among unskilled  
 182 workers. Employees who possess adequate or basic knowledge about HST such as, the time it  
 183 takes to get back the results, the accuracy of the results, the interpretation of results, and how  
 184 HST is administered among others take an extra step and use the HST kit. Additionally, such  
 185 an employee is likely to be more careful with his/her life/health by ensuring HIV testing comes  
 186 first before engaging in any transactional or non-transactional sexual behavior which might be  
 187 risky.

188 These findings corroborate those of Vara and colleagues who found out that possession  
 189 of knowledge about HIV richly aids in overcoming fear and denial, that is, people that were  
 190 initially afraid of HIV and in denial of its existence around them is overcome once they get to  
 191 learn more about it which then influences their perceptions towards it and contributes to  
 192 behavior modification [20]. Similarly, being knowledgeable about prevention, treatment,  
 193 transmission and other facts about HIV, encourages logical safe sex behavior [21]. Therefore,  
 194 the possibility that the possession of adequate and accurate knowledge is highly correlated to  
 195 preventive efforts is a powerful motivating factor in most educational projects related to  
 196 HIV/AIDS. The intention to utilize HST has been proven to be influenced by knowledge [20].

197 It was hypothesized that HST knowledge is significantly related to individual perceived  
 198 susceptibility. The findings indicate that there is a significant relationship between HST  
 199 knowledge and individual perceived susceptibility. An employee who has full information  
 200 regarding HST is most likely to have high perceived susceptibility simply because being aware  
 201 of what the test can do and how to use it effectively makes an individual perceive themselves

## Self-testing knowledge and beliefs on HIV self-testing use in central Uganda.

202 as susceptible to acquiring HIV. Knowledge can be very life threatening at times that a person  
203 with it will feel at risk of becoming a victim because they are aware of the aftermath of their  
204 actions if they do not pay attention to their behavior. In this case, a person will be afraid of  
205 engaging in any risky sexual behaviors because of the costs attached. However, a person who  
206 has shallow or no knowledge about HST may not see themselves at risk because they do not  
207 know the costs attached to being unsure of their HIV sero-status and psychological wellbeing.

208 The above findings are in contrast with a Ghanaian study where Ghanaian adolescents  
209 had a negative impression of their risk of contracting HIV, in other words, they did not find  
210 themselves to be at risk. This can be attributed to the kind of behaviors they were engaged in  
211 or even ignorance. The findings further suggest that 16% of the male adolescents and 15% of  
212 the females thought they were at risk. This represents a small number of adolescents that find  
213 themselves susceptible to contracting HIV [22]. A surprising finding also indicates that  
214 individuals who felt more susceptible to contracting HIV, 70% males and 59% of the older  
215 adolescents, were more engaged in sexual activity [22]. The findings imply that older teenagers  
216 compared to those between the ages of 10 and 14, were more likely to believe they were at  
217 danger of obtaining HIV. In order to lower their chances of catching HIV, some, almost 57%  
218 of females and 47% of males, said they avoided having intercourse, while others, 12% of  
219 females and 20% of males, said they used condoms [22].

220 It was also hypothesized that knowledge of HST is significantly related to individual  
221 perceived benefits. The findings confirm that HST knowledge has a positive significant  
222 relationship with individual perceived benefits of using HST whereby, possession or  
223 acquisition of key information regarding HST use is most likely going to positively increase  
224 the use of the intervention. Similarly, an employee, after realizing that HST outweighs any  
225 other options and, most importantly, with the added benefits such as privacy, convenience, time  
226 saving and easy interpretation among so much more; such an individual is most likely to use  
227 the method for he/she had already been equipped with the necessary knowledge and  
228 information pertaining HST.

229 Contrary to the study findings, a study in Kenya conducted by Olakunde and colleagues  
230 [23] among young adults found that concerns and misconceptions relating to HST (inaccurate  
231 results, harmful, ill-omened) were reasons for non-use of HST. In fact, young adults who stated  
232 that they had heard of HST, were, prior to the study, also significantly less likely to be willing  
233 to use HST because of their prior knowledge of self-test kits. Participants with the lowest levels  
234 of education were also less likely to endorse HST [23]. Students in Uganda who had ever tested  
235 for HIV and were sexually active, indicated the need for frequent HIV testing and chose to use  
236 self-test kits because they (kits) were practical, simple to use, and guaranteed privacy [24].

237 It was also hypothesized that HST knowledge is significantly related to individual  
238 perceived barriers. The findings indicate that HST knowledge has a significant positive  
239 relationship with individual perceived barriers. The results indicate that employees that possess  
240 HST knowledge have higher chances of perceiving HST as a barrier. In other words, the  
241 knowledge of HST makes them much more worried to attempt and use the service. This could  
242 be attributed to the fear that comes should the results turn out negative or, from experiences  
243 with people that have in the past succumbed to HIV, hence posing as a barrier to HST. Men, in  
244 most cases, have been found unreceptive towards HST due to busy work schedules and  
245 demands from aspects of life hence finding HIV testing not only a waste of time, but also, in

## Self-testing knowledge and beliefs on HIV self-testing use in central Uganda.

246 some cases, taken for granted; they imagine that a negative HIV test result for their spouses  
247 who visit health centres during antenatal care [25], implies that they too are negative hence  
248 seeing no need of going for HIV testing [26].

249 It was hypothesized that individual perceived susceptibility positively relates and  
250 predict HST use. The study findings indicate that individual's perceived susceptibility has a  
251 significant positive relationship with HST use and predicts HST use by 14%, that is, employees  
252 who find themselves highly susceptible to acquire HIV, are more likely going to be drawn  
253 towards undertaking HST to ensure they are always safe. In this study, 90% of the employees  
254 found themselves to be highly susceptible to contracting HIV depending on either the partners'  
255 behavior or their own. Therefore, this led to 87% of the employees to feel inclined toward using  
256 HST if provided at work given the benefits that come along with it.

257 The findings concur with those of Magno and Castellós who discovered that numerous  
258 factors, including STIs, alcohol usage, drug injection, and several-sexual-partners, affect young  
259 women's susceptibility to HIV [27]. The risk perception and willingness to test for HIV  
260 were higher among young women who engage in these high-risk behaviors. Finally, students  
261 in Uganda who were sexually active chose to use self-test kits because they were practical,  
262 simple to use, and guaranteed privacy [24]. However, contrarily, participants in Kenya were  
263 considerably less likely to utilize an oral HST kit if they had recently engaged in high-risk  
264 sexual behaviors [23].

265 It was also hypothesized that individual perceived benefits significantly relate and  
266 predict HST use among unskilled workers. The findings indicate that individual perceive  
267 benefits have a positive significant relationship with HST use and perceived individual benefits  
268 stood out with a prediction rate of 44.2% on HST use. Employees who knew about the benefits  
269 that result from HST were more prepared to participate in HST since the benefits outweighed  
270 the cons. Therefore, to increase HST especially in a busy working environment, benefits  
271 pertaining a particular health intervention must be laid out so that respondents get a chance to  
272 weigh the risks and benefits of such a practice.

273 Similarly, self-testing willingness appeared to be mostly motivated by the need to  
274 obtain convenient and private information about one's HIV status [23]. In a study of key HIV  
275 stakeholders, HST was viewed as a method of addressing persons who are underserved or  
276 unknown. For instance, taking a test in a health centre would not be appropriate in a  
277 professional workplace where everyone wears business attire. Such a group is probably going  
278 to adhere to the new HST trend [26]. Results from the HST were seen to be more trustworthy  
279 than those obtained from regular HIV testing at clinics. Over 80% of Ugandan fishermen who  
280 participated in a study of men in Sub-Saharan Africa agreed with the HST findings [28].

281 It was finally hypothesized that individual perceived barriers significantly relate and  
282 predict HST use among unskilled employees. The findings further confirm that individual  
283 perceived barriers do have a positive significant relationship with HST use and a prediction  
284 level of 4.8% that is, 64% of the employees who perceived other underlying barriers to HST  
285 also strongly agreed on using it in other words, be it that HST would pose some unwanted  
286 challenges to some individuals such as lack of counselling before and after services, the  
287 credibility of results and falsification among others, this did not however limit them from  
288 wanting to use the method if provided. Hence affirming the importance of HST.



## Self-testing knowledge and beliefs on HIV self-testing use in central Uganda.

289 Equally to the findings, a study in Uganda found out that, men's non-engagement in  
290 HIV testing programs has often been attributed to work commitments and a lack of time [29].  
291 However, Muwanguzi and colleagues confirmed that accessibility to HIV testing services was  
292 a motivator for workplace-based HIV self-testing [14]. Self-testing for HIV at work could be a  
293 potential solution to the problems with facility-based testing that are now present, such as long  
294 wait times, big lineups, and a lack of counsellors [30]. Unfortunately, the difficulty in  
295 connecting to care after HIV self-testing still exists [31]. Oduetse and colleagues suggest  
296 providing follow-up assistance to everyone who purchases test kits to strengthen the connection  
297 to post-test services [32].

298

### 299 **Conclusion**

300 Making individuals aware of the benefits of HST use and equipping them with  
301 sufficient knowledge pertaining the desired action would go a long way in curbing down the  
302 indulgence in risky sexual behaviors and decrease the spread of HIV especially in populations  
303 with limited access to health care.

### 304 **Acknowledgements**

305 Research reported in this publication was supported by the Fogarty International  
306 Center, National Institute of Alcohol Abuse and Alcoholism, National Institute of Mental  
307 Health, of the National Institutes of Health under Award Number D43 TW011304. The content  
308 is solely the responsibility of the authors and does not necessarily represent the official views  
309 of the National Institutes of Health. In a unique way, we do recognize the Department of  
310 Educational, Social and Organizational Psychology for having been a safe harbour and source  
311 of wisdom during the entire process and finally the research assistants who made this work  
312 come to life.

### 313 **Author contributions**

314 **Conceptualization:** Gerald Mukisa Nsereko, Martin Mabunda Baluku, Khamis Musanje,  
315 Loyce Kobusingye, Joanita Nangendo

316 **Formal analysis:** Gerald Mukisa Nsereko, Simon Nantamu, Martin Mabunda Baluku

317 **Funding acquisition:** Gerald Mukisa Nsereko

318 **Investigation:** Gerald Mukisa Nsereko

319 **Methodology:** Gerald Mukisa Nsereko, Martin Mabunda Baluku, Khamis Musanje

320 **Project administration:** Gerald Mukisa Nsereko, Ayesiga Eron Robinah

321 **Resources:** Gerald Mukisa Nsereko

322 **Supervision:** Loyce Kiiza Kobusingye, Martin Mabunda Baluku Khamis Musanje

323 **Validation:** Gerald Mukisa Nsereko, Loyce Kiiza Kobusingye, Martin Mabunda Baluku  
324 Khamis Musanje

325 **Visualization:** Gerald Mukisa Nsereko, Loyce Kiiza Kobusingye, Martin Mabunda Baluku  
326 Khamis Musanje

## Self-testing knowledge and beliefs on HIV self-testing use in central Uganda.

327 **Writing – original draft:** Gerald Mukisa Nsereko, Khamis Musanje, Martin Mabunda Baluku

328 **Writing – review & editing:** Gerald Mukisa Nsereko, Martin Mabunda Baluku, Khamis  
329 Musanje, Loyce Kiiza Kobusingye, Simon Nantamu, Joanita Nangendo, and Peter Nsubuga.

330

## 331 **References**

- 332 1. UNAIDS. Global HIV statistics. 2022:1-6.
- 333 2. UPHIA. Population-based HIV impact assessment. 2022:2020-3.
- 334 3. UNAIDS. UNAIDS data 2021. 2021:4-38.
- 335 4. WHO, ILO. POLICY BRIEF HIV SELF-TESTING AT WORKPLACES :  
336 APPROACHES TO IMPLEMENTATION AND SUSTAINABLE FINANCING.  
337 2022(May).
- 338 5. Nakanwagi S, Matovu JKB, Kintu BN, Kaharuzza F, Wanyenze RK. Facilitators and  
339 Barriers to Linkage to HIV Care among Female Sex Workers Receiving HIV Testing  
340 Services at a Community-Based Organization in Periurban Uganda : A Qualitative  
341 Study. 2016;2016.
- 342 6. Johnson CC, Kennedy C, Fonner, Siegfried N, Figueroa C, Dalal S, et al. Examining  
343 the effects of HIV self-testing compared to standard. Journal of the International AIDS  
344 Society; 2017. p. 10-.
- 345 7. Kelvin EA, Mwai E, Romo ML, George G, Govender K, Je M, et al. Evaluating oral  
346 HIV self-testing to increase HIV testing uptake among truck drivers in Kenya.  
347 2017(July):1-68.
- 348 8. MOH. ACCELERATION OF HIV PREVENTION in uganda. 2018.
- 349 9. Muwanguzi PA, Nasuuna EM, Namimbi F, Osingada CP, Ngabirano TD. Venues and  
350 methods to improve professional men ' s access to HIV self- testing and linkage to HIV  
351 prevention or treatment : a qualitative study. 2021;6:1-12.
- 352 10. WHO, ILO. HIV SELF-TESTING AT THE WORKPLACE. 2020;2016:1-8.
- 353 11. Vithalani J, Herreros-Villanueva M. HIV Epidemiology in Uganda: survey based on  
354 age, gender, number of sexual partners and frequency of testing. Afr Health Sci.  
355 2018;18(3):523-30.
- 356 12. Ministry Of Health U. Consolidated Guidelines for the Prevention and Treatment of  
357 HIV and AIDS in Uganda. February, 2020. 2020(February):142-70.
- 358 13. Shapiro Lenz D. UNDERSTANDING THE RELATIONSHIP BETWEEN COMPASSION AND  
359 EMPLOYEE ENGAGEMENT. 2017.
- 360 14. Muwanguzi PA, Ngabirano TD, Kiwanuka N, Nelson LE, Nasuuna EM, Osingada CP,  
361 et al. The Effects of Workplace-Based HIV Self-testing on Uptake of Testing and  
362 Linkage to HIV Care or Prevention by Men in Uganda (WISe-Men): Protocol for a  
363 Cluster Randomized Trial. JMIR Res Protoc. 2021;10(11):e25099.
- 364 15. Eshun-Wilson I, Jamil MS, Witzel TC, Glidded DV, Johnson C, Le Trouneau N, et al.  
365 A Systematic Review and Network Meta-analyses to Assess the Effectiveness of  
366 Human Immunodeficiency Virus (HIV) Self-testing Distribution Strategies. Clin Infect  
367 Dis. 2021;73(4):e1018-e28.
- 368 16. Luo YF, Chen LC, Yang SC, Hong SH. Knowledge, Attitude, and Practice (KAP)  
369 toward COVID-19 Pandemic among the Public in Taiwan: A Cross-Sectional Study.  
370 International Journal of Environmental Research and Public Health. 2022;19(5):1-14.
- 371 17. Strecher VJ, Champion VL, Rosenstock IM. Strecher, Health Belief model, Handbook  
372 Health Beh, 1997.pdf. 1997. p. 71-91.

## Self-testing knowledge and beliefs on HIV self-testing use in central Uganda.

- 373 18. Mertens D. *Research and Evaluation in Education and Psychology: Integrating*  
374 *Diversity with Quantitative, Qualitative, and Mixed Methods* 5th edition 2019.
- 375 19. Bosco MJ, Tusiime JB, Mayega RW, Nalubega S. Uptake of oral-based HIV self-  
376 testing among Key Populations taking HIV pre-exposure prophylaxis in central  
377 Uganda. 2020;1-36.
- 378 20. Vara PA, Buhulula LS, Mohammed FA, Njau B. Level of knowledge, acceptability,  
379 and willingness to use oral fluid HIV self-testing among medical students in  
380 Kilimanjaro region, Tanzania: a descriptive cross-sectional study. *AIDS Research and*  
381 *Therapy*. 2020;17(1):56.
- 382 21. Ryan S, Hahn E, Rao A, Mwinnyaa G, Black J, Maharaj R, et al. The impact of HIV  
383 knowledge and attitudes on HIV testing acceptance among patients in an emergency  
384 department in the Eastern Cape, South Africa. *BMC Public Health*. 2020;20(1):1066.
- 385 22. Darteh EKM, Kumi-kyereme A, Awusabo-asare K. Perception of Risk of HIV among  
386 Adolescents' Living in an Urban Slum in Ghana. 2016;20(1):62-70.
- 387 23. Olakunde BO, Alemu D, Conserve DF, Mathai M, Mak'anyengo MO, Jennings Mayo-  
388 Wilson L. Awareness of and willingness to use oral HIV self-test kits among Kenyan  
389 young adults living in informal urban settlements: a cross-sectional survey. *AIDS Care*  
390 *- Psychological and Socio-Medical Aspects of AIDS/HIV*. 2022;1-11.
- 391 24. Segawa I, Bakeera-Kitaka S, Ssebambulidde K, Muwonge TR, Oriokot L, Ojiambo  
392 KO, et al. Factors associated with HIV self-testing among female university students in  
393 Uganda: a cross-sectional study. *AIDS Res Ther*. 2022;19(1):59.
- 394 25. Choko AT, Nanfuka M, Birungi J, Taasi G, Kitembo P, Hellinginger S. A pilot trial of  
395 the peer-based distribution of HIV self-test kits among fishermen in Bulisa, Uganda.  
396 *PLoS ONE*. 2018;13(11):1-12.
- 397 26. Makusha T, Knight L, Taegtmeier M, Tulloch O, Davids A, Lim J, et al. HIV Self-  
398 Testing Could "Revolutionize Testing in South Africa, but It Has Got to Be Done  
399 Properly": Perceptions of Key Stakeholders. *PLOS ONE*. 2015;10(3):e0122783.
- 400 27. Magno L, Castellanos MEP. Meanings and vulnerability to HIV/AIDS among long-  
401 distance truck drivers in Brazil. *Revista de saude publica*. 2016;50:76-.
- 402 28. Hamilton A, Thompson N, Choko AT, Hlongwa M, Jolly P, Korte JE, et al. HIV Self-  
403 Testing Uptake and Intervention Strategies Among Men in Sub-Saharan Africa: A  
404 Systematic Review. *Front Public Health*. 2021;9:594298.
- 405 29. Camlin CS, Ssemmondo E, Chamie G, El Ayadi AM, Kwarisiima D, Sang N, et al.  
406 Men "missing" from population-based HIV testing: insights from qualitative research.  
407 *AIDS Care*. 2016;28(sup3):67-73.
- 408 30. Siu GE, Wight D, Seeley JA. Masculinity, social context and HIV testing: an  
409 ethnographic study of men in Busia district, rural eastern Uganda. *BMC Public Health*.  
410 2014;14(1):33.
- 411 31. WHO. Guidelines on HIV self-testing and partner notification. Who. 2016(December).
- 412 32. Oduetse OK, Nkomo B, Majingo N, Mashalla Y, Seloilwe E. Perceptions and attitudes  
413 towards acceptability of HIV self-testing among female sex workers in Selibe Phikwe,  
414 Botswana. *African Journal of AIDS Research*. 2019;18(3):192-7.
